# Supplementary material
Source: PubMed Central journal article supplement (PMC3021201)
Supplement: appendix1.pdf [file appendix1.pdf]

| SNP        | Gene    | SNP       | Gene   | SNP      | Gene  |
|------------|---------|-----------|--------|----------|-------|
| AHRR_01    | AHRR    | C8G_01    | C8G    | MASP1_57 | MASP1 |
| AHRR_02    | AHRR    | C8G_02    | C8G    | MASP1_60 | MASP1 |
| AHRR_10    | AHRR    | C9_01     | C9     | MASP1_64 | MASP1 |
| AHR_01     | AHR     | C9_02     | C9     | MASP1_69 | MASP1 |
| AKR1A1_02  | AKR1A1  | C9_03     | C9     | MASP1_99 | MASP1 |
| AKR1C1_02  | AKR1C1  | C9_04     | C9     | MASP2_05 | MASP2 |
| AKR1C3_01  | AKR1C3  | C9_05     | C9     | MASP2_15 | MASP2 |
| AKR1C3_08  | AKR1C3  | C9_06     | C9     | MASP2_17 | MASP2 |
| ALDH1L1_01 | ALDH1L1 | C9_07     | C9     | MBL2_04  | MBL2  |
| ALDH1L1_03 | ALDH1L1 | C9_08     | C9     | MBL2_06  | MBL2  |
| ALOX5_01   | ALOX5   | C9_09     | C9     | MBL2_08  | MBL2  |
| APEX1_03   | APEX1   | C9_10     | C9     | MBL2_26  | MBL2  |
| BCL2L1_02  | BCL2L1  | C9_11     | C9     | MBL2_40  | MBL2  |
| BCL2L1_03  | BCL2L1  | CARD15_05 | CARD15 | MBL2_83  | MBL2  |
| BCL6_01    | BCL6    | CARD15_22 | CARD15 | MBL2_84  | MBL2  |
| BCL6_01_2  | BCL6    | CARD15_34 | CARD15 | MBL2_85  | MBL2  |
| BCL6_11    | BCL6    | CARD15_35 | CARD15 | MBL2_86  | MBL2  |
| BHMT_01    | BHMT    | CARD15_36 | CARD15 | MBL2_87  | MBL2  |
| BRCA1_01   | BRCA1   | CARD15_37 | CARD15 | MBL2_88  | MBL2  |
| BRCA1_02   | BRCA1   | CARD15_38 | CARD15 | MBL2_89  | MBL2  |
| BRCA1_03   | BRCA1   | CARD15_39 | CARD15 | MBL2_90  | MBL2  |
| BRCA1_04   | BRCA1   | CARD4_01  | CARD4  | MBP_01   | MBP   |
| BRCA1_21   | BRCA1   | CARD4_02  | CARD4  | MBP_02   | MBP   |
| BRCA2_01   | BRCA2   | CARD4_03  | CARD4  | MBP_03   | MBP   |
| BRCA2_02   | BRCA2   | CARD4_04  | CARD4  | MBP_04   | MBP   |
| BRCA2_03   | BRCA2   | CARD4_05  | CARD4  | MBP_05   | MBP   |
| BRCA2_04   | BRCA2   | CARD4_06  | CARD4  | MBP_06   | MBP   |
| BRCA2_04_2 | BRCA2   | CARD4_07  | CARD4  | MBP_07   | MBP   |
| BRCA2_06   | BRCA2   | CARD4_08  | CARD4  | MBP_08   | MBP   |
| BRCA2_06_2 | BRCA2   | CARD4_09  | CARD4  | MBP_09   | MBP   |
| BRCA2_10   | BRCA2   | CARD4_10  | CARD4  | MBP_10   | MBP   |
| BRCA2_13   | BRCA2   | CARD4_11  | CARD4  | MBP_11   | MBP   |
| BRCA2_13_2 | BRCA2   | CARD4_12  | CARD4  | MBP_12   | MBP   |
| CARD15_01  | CARD15  | CCL11_01  | CCL11  | MBP_13   | MBP   |
| CARD15_02  | CARD15  | CCL11_02  | CCL11  | MBP_14   | MBP   |
| CASP10_02  | CASP10  | CCL11_03  | CCL11  | MBP_15   | MBP   |
| CASP3_08   | CASP3   | CCL11_04  | CCL11  | MBP_16   | MBP   |
| CASP3_09   | CASP3   | CCL11_05  | CCL11  | MBP_17   | MBP   |
| CASP8_02   | CASP8   | CCL11_06  | CCL11  | MBP_18   | MBP   |
| CASP9_01   | CASP9   | CCL11_07  | CCL11  | MBP_19   | MBP   |
| CBS_01     | CBS     | CCL11_08  | CCL11  | MBP_20   | MBP   |
| CBS_01_2   | CBS     | CCL13_01  | CCL13  | MBP_21   | MBP   |
| CBS_03     | CBS     | CCL13_02  | CCL13  | MBP_22   | MBP   |
| CBS_04     | CBS     | CCL18_01  | CCL18  | MBP_23   | MBP   |
| CCND1_01   | CCND1   | CCL18_02  | CCL18  | MBP_24   | MBP   |
| CCND1_02   | CCND1   | CCL18_03  | CCL18  | MBP_25   | MBP   |

|             |        |          |       |         |      |
|-------------|--------|----------|-------|---------|------|
| CCNH_01     | CCNH   | CCL18_04 | CCL18 | MBP_26  | MBP  |
| CCR2_01     | CCR2   | CCL18_05 | CCL18 | MBP_27  | MBP  |
| CCR5_01     | CCR5   | CCL1_01  | CCL1  | MBP_28  | MBP  |
| CCR5_02     | CCR5   | CCL1_02  | CCL1  | MBP_29  | MBP  |
| CCR5_04     | CCR5   | CCL1_03  | CCL1  | MBP_30  | MBP  |
| CCR5_04_2   | CCR5   | CCL1_04  | CCL1  | MBP_31  | MBP  |
| CDKN2A_01   | CDKN2A | CCL1_05  | CCL1  | MBP_32  | MBP  |
| CDKN2A_02   | CDKN2A | CCL20_01 | CCL20 | MBP_33  | MBP  |
| CDKN2A_03   | CDKN2A | CCL20_02 | CCL20 | MBP_34  | MBP  |
| CHEK1_02    | CHEK1  | CCL20_03 | CCL20 | MBP_35  | MBP  |
| CHEK2_02    | CHEK2  | CCL20_04 | CCL20 | MBP_36  | MBP  |
| CSF2_01     | CSF2   | CCL20_05 | CCL20 | MCP_01  | MCP  |
| CSF2_02     | CSF2   | CCL20_06 | CCL20 | MCP_02  | MCP  |
| CSF3_07     | CSF3   | CCL20_07 | CCL20 | MCP_04  | MCP  |
| CTLA4_01    | CTLA4  | CCL24_01 | CCL24 | MCP_05  | MCP  |
| CTLA4_01_2  | CTLA4  | CCL24_02 | CCL24 | MCP_06  | MCP  |
| CX3CR1_01   | CX3CR1 | CCL24_03 | CCL24 | MCP_07  | MCP  |
| CXCL12_01   | CXCL12 | CCL24_04 | CCL24 | MCP_08  | MCP  |
| CXCL12_01_2 | CXCL12 | CCL24_05 | CCL24 | MEFV_01 | MEFV |
| CYBA_01     | CYBA   | CCL24_06 | CCL24 | MEFV_02 | MEFV |
| CYBA_02     | CYBA   | CCL26_01 | CCL26 | MEFV_03 | MEFV |
| CYBA_02_2   | CYBA   | CCL26_02 | CCL26 | MEFV_04 | MEFV |
| CYBA_07     | CYBA   | CCL26_03 | CCL26 | MEFV_05 | MEFV |
| CYP1A1_01   | CYP1A1 | CCL2_01  | CCL2  | MIF_14  | MIF  |
| CYP1A2_03   | CYP1A2 | CCL2_02  | CCL2  | MIF_15  | MIF  |
| CYP1B1_05   | CYP1B1 | CCL2_03  | CCL2  | MIF_16  | MIF  |
| CYP1B1_05_2 | CYP1B1 | CCL2_04  | CCL2  | MIF_17  | MIF  |
| CYP2C9_03   | CYP2C9 | CCL5_03  | CCL5  | MIF_18  | MIF  |
| CYP2E1_07   | CYP2E1 | CCL5_05  | CCL5  | MIF_19  | MIF  |
| CYP2E1_08   | CYP2E1 | CCL7_01  | CCL7  | MIF_20  | MIF  |
| EPHX1_01    | EPHX1  | CCL7_02  | CCL7  | MIF_21  | MIF  |
| EPHX1_06    | EPHX1  | CCL7_03  | CCL7  | MIF_22  | MIF  |
| ERCC1_04    | ERCC1  | CCL7_04  | CCL7  | MIF_23  | MIF  |
| ERCC2_02    | ERCC2  | CCL7_05  | CCL7  | MPO_03  | MPO  |
| ERCC2_03    | ERCC2  | CCL7_06  | CCL7  | MPO_04  | MPO  |
| ERCC4_02    | ERCC4  | CCL8_01  | CCL8  | MPO_17  | MPO  |
| ERCC5_01    | ERCC5  | CCL8_02  | CCL8  | MPO_18  | MPO  |
| ERCC5_02    | ERCC5  | CCL8_03  | CCL8  | MUC6_01 | MUC6 |
| FAS_02      | FAS    | CCL8_04  | CCL8  | MUC6_02 | MUC6 |
| FAS_02_2    | FAS    | CCL8_05  | CCL8  | MUC6_03 | MUC6 |
| FAS_04      | FAS    | CCL8_06  | CCL8  | MUC6_04 | MUC6 |
| FAS_04_2    | FAS    | CCL8_07  | CCL8  | MUC6_05 | MUC6 |
| FCGR2A_01   | FCGR2A | CCR1_01  | CCR1  | MUC6_06 | MUC6 |
| FPGS_01     | FPGS   | CCR1_02  | CCR1  | MUC6_07 | MUC6 |
| GGH_01      | GGH    | CCR1_03  | CCR1  | MUC6_08 | MUC6 |
| GGH_02      | GGH    | CCR1_04  | CCR1  | MUC6_09 | MUC6 |
| GPX1_01     | GPX1   | CCR1_05  | CCR1  | MUC6_10 | MUC6 |

|             |        |         |      |           |        |
|-------------|--------|---------|------|-----------|--------|
| GSTM3_02    | GSTM3  | CCR3_07 | CCR3 | MUC6_13   | MUC6   |
| GSTP1_01    | GSTP1  | CCR3_08 | CCR3 | MUC6_14   | MUC6   |
| GSTP1_02    | GSTP1  | CCR3_09 | CCR3 | MUC7_01   | MUC7   |
| GSTT1_02    | GSTT1  | CCR3_10 | CCR3 | MUC7_02   | MUC7   |
| HIF1AN_01   | HIF1AN | CCR3_11 | CCR3 | MUC7_03   | MUC7   |
| HMOX1_01    | HMOX1  | CCR3_12 | CCR3 | MUC7_04   | MUC7   |
| ICAM1_01    | ICAM1  | CCR3_13 | CCR3 | MUC7_05   | MUC7   |
| IFNA1_02    | IFNA1  | CCR3_14 | CCR3 | MUC7_06   | MUC7   |
| IFNGR1_05   | IFNGR1 | CCR3_15 | CCR3 | MUC7_07   | MUC7   |
| IFNGR2_01   | IFNGR2 | CCR3_16 | CCR3 | MUC7_08   | MUC7   |
| IFNGR2_02   | IFNGR2 | CCR4_01 | CCR4 | MUC7_09   | MUC7   |
| IFNGR2_03   | IFNGR2 | CCR4_02 | CCR4 | MVD_01    | MVD    |
| IFNGR2_03_2 | IFNGR2 | CCR6_01 | CCR6 | MVD_02    | MVD    |
| IFNGR2_04   | IFNGR2 | CCR6_02 | CCR6 | MYD88_01  | MYD88  |
| IFNG_07     | IFNG   | CCR6_03 | CCR6 | MYD88_02  | MYD88  |
| IFNG_10     | IFNG   | CCR6_04 | CCR6 | MYD88_03  | MYD88  |
| IL10RA_02   | IL10RA | CCR6_05 | CCR6 | NAB2_03   | NAB2   |
| IL10_01     | IL10   | CCR6_06 | CCR6 | NAB2_04   | NAB2   |
| IL10_02     | IL10   | CCR6_07 | CCR6 | NCF2_27   | NCF2   |
| IL10_03     | IL10   | CCR6_08 | CCR6 | NCF2_28   | NCF2   |
| IL10_05     | IL10   | CCR6_09 | CCR6 | NCF2_29   | NCF2   |
| IL10_06     | IL10   | CCR6_10 | CCR6 | NCF2_30   | NCF2   |
| IL10_07     | IL10   | CCR6_11 | CCR6 | NCF2_31   | NCF2   |
| IL10_17     | IL10   | CCR6_12 | CCR6 | NCF2_34   | NCF2   |
| IL10_17_2   | IL10   | CCR6_14 | CCR6 | NCF2_35   | NCF2   |
| IL12A_01    | IL12A  | CCR7_01 | CCR7 | NCF4_12   | NCF4   |
| IL12A_07    | IL12A  | CCR7_02 | CCR7 | NCF4_18   | NCF4   |
| IL12B_04    | IL12B  | CCR7_03 | CCR7 | NCF4_33   | NCF4   |
| IL13_01     | IL13   | CCR7_04 | CCR7 | NCF4_34   | NCF4   |
| IL13_03     | IL13   | CCR8_01 | CCR8 | NCF4_35   | NCF4   |
| IL13_06     | IL13   | CCR8_03 | CCR8 | NCF4_36   | NCF4   |
| IL15RA_02   | IL15RA | CCR8_04 | CCR8 | NCF4_37   | NCF4   |
| IL15_02     | IL15   | CCR9_01 | CCR9 | NCF4_38   | NCF4   |
| IL16_02     | IL16   | CCR9_02 | CCR9 | NCF4_39   | NCF4   |
| IL16_03     | IL16   | CCR9_03 | CCR9 | NCF4_41   | NCF4   |
| IL1A_01     | IL1A   | CCR9_04 | CCR9 | NCF4_42   | NCF4   |
| IL1A_02     | IL1A   | CCR9_06 | CCR9 | NCF4_43   | NCF4   |
| IL1A_05     | IL1A   | CCR9_07 | CCR9 | NCF4_44   | NCF4   |
| IL1B_01     | IL1B   | CCR9_08 | CCR9 | NCF4_45   | NCF4   |
| IL1B_02     | IL1B   | CCR9_09 | CCR9 | NCF4_46   | NCF4   |
| IL1B_03     | IL1B   | CCR9_10 | CCR9 | NCF4_47   | NCF4   |
| IL1RN_02    | IL1RN  | CCR9_11 | CCR9 | NCF4_48   | NCF4   |
| IL2_01      | IL2    | CCR9_12 | CCR9 | NCF4_49   | NCF4   |
| IL3_01      | IL3    | CCR9_13 | CCR9 | NDUFS2_01 | NDUFS2 |
| IL4R_02     | IL4R   | CD14_03 | CD14 | NDUFS2_02 | NDUFS2 |
| IL4R_06     | IL4R   | CD14_06 | CD14 | NDUFS2_03 | NDUFS2 |
| IL4R_10     | IL4R   | CD14_07 | CD14 | NDUFS2_04 | NDUFS2 |

|            |       |           |        |          |       |
|------------|-------|-----------|--------|----------|-------|
| IL4R_17    | IL4R  | CD180_01  | CD180  | NFKB1_14 | NFKB1 |
| IL4R_23    | IL4R  | CD180_02  | CD180  | NFKB1_35 | NFKB1 |
| IL4_01     | IL4   | CD180_03  | CD180  | NFKB1_36 | NFKB1 |
| IL4_02     | IL4   | CD180_04  | CD180  | NFKB1_37 | NFKB1 |
| IL4_03     | IL4   | CD180_05  | CD180  | NFKB1_38 | NFKB1 |
| IL4_10     | IL4   | CD180_06  | CD180  | NFKB1_39 | NFKB1 |
| IL4_11     | IL4   | CD180_07  | CD180  | NFKB1_40 | NFKB1 |
| IL5_02     | IL5   | CD180_08  | CD180  | NFKB1_41 | NFKB1 |
| IL5_06     | IL5   | CD180_09  | CD180  | NFKB1_42 | NFKB1 |
| IL5_09     | IL5   | CD180_10  | CD180  | NFKB1_43 | NFKB1 |
| IL5_10     | IL5   | CD180_11  | CD180  | NFKB1_44 | NFKB1 |
| IL6_01     | IL6   | CD180_12  | CD180  | NFKB1_45 | NFKB1 |
| IL6_04     | IL6   | CD209_03  | CD209  | NFKB1_46 | NFKB1 |
| IL6_05     | IL6   | CD209_04  | CD209  | NFKB1_47 | NFKB1 |
| IL7R_01    | IL7R  | CD209_05  | CD209  | NOS1_01  | NOS1  |
| IL7R_08    | IL7R  | CD209_06  | CD209  | NOS1_02  | NOS1  |
| IL8RA_01   | IL8RA | CD209_07  | CD209  | NOS1_03  | NOS1  |
| IL8RB_01   | IL8RB | CD209_08  | CD209  | NOS1_04  | NOS1  |
| IL8RB_01_2 | IL8RB | CD209_09  | CD209  | NOS1_05  | NOS1  |
| IL8RB_02   | IL8RB | CD209_10  | CD209  | NOS1_06  | NOS1  |
| IL8RB_04   | IL8RB | CD209_11  | CD209  | NOS1_07  | NOS1  |
| IL8_01     | IL8   | CD7_01    | CD7    | NOS1_08  | NOS1  |
| IL8_04     | IL8   | CENTA1_01 | CENTA1 | NOS1_09  | NOS1  |
| IL8_05     | IL8   | CENTA1_02 | CENTA1 | NOS1_10  | NOS1  |
| IL8_07     | IL8   | CLCA1_01  | CLCA1  | NOS1_12  | NOS1  |
| IL9R_01    | IL9R  | CLCA1_02  | CLCA1  | NOS1_13  | NOS1  |
| IL9_01     | IL9   | CLCA1_03  | CLCA1  | NOS1_14  | NOS1  |
| IRF1_01    | IRF1  | CLCA1_04  | CLCA1  | NOS1_15  | NOS1  |
| IRF1_01_2  | IRF1  | CLCA1_05  | CLCA1  | NOS1_16  | NOS1  |
| IRF1_02    | IRF1  | CLCA1_06  | CLCA1  | NOS1_17  | NOS1  |
| IRF1_02_2  | IRF1  | CLCA1_07  | CLCA1  | NOS1_18  | NOS1  |
| IRF1_03    | IRF1  | CLCA1_08  | CLCA1  | NOS1_19  | NOS1  |
| IRF1_04    | IRF1  | CLCA1_09  | CLCA1  | NOS1_20  | NOS1  |
| IRF1_05    | IRF1  | CLCA1_10  | CLCA1  | NOS1_21  | NOS1  |
| IRF1_05_2  | IRF1  | CLCA1_11  | CLCA1  | NOS1_22  | NOS1  |
| IRF3_01    | IRF3  | CLCA1_12  | CLCA1  | NOS1_23  | NOS1  |
| IRF3_02    | IRF3  | CLCA1_13  | CLCA1  | NOS1_24  | NOS1  |
| JAK3_01    | JAK3  | CLCA1_14  | CLCA1  | NOS1_25  | NOS1  |
| JAK3_03    | JAK3  | CLCA1_15  | CLCA1  | NOS1_26  | NOS1  |
| JAK3_04    | JAK3  | CLCA1_16  | CLCA1  | NOS1_27  | NOS1  |
| JAK3_04_2  | JAK3  | CLCA1_17  | CLCA1  | NOS1_28  | NOS1  |
| LEPR_02    | LEPR  | CLCA1_18  | CLCA1  | NOS1_29  | NOS1  |
| LEPR_03    | LEPR  | CLCA1_19  | CLCA1  | NOS1_30  | NOS1  |
| LEPR_03_2  | LEPR  | CLCA1_20  | CLCA1  | NOS1_31  | NOS1  |
| LIG4_02    | LIG4  | CLCA1_21  | CLCA1  | NOS1_32  | NOS1  |
| LMO2_01    | LMO2  | CLCA1_22  | CLCA1  | NOS2A_09 | NOS2A |
| LMO2_02    | LMO2  | CLCA1_23  | CLCA1  | NOS2A_11 | NOS2A |

|            |         |            |         |            |         |
|------------|---------|------------|---------|------------|---------|
| LMO2_03    | LMO2    | CLCA1_24   | CLCA1   | NOS2A_12   | NOS2A   |
| LTA_01     | LTA     | CLCA2_01   | CLCA2   | NOS2A_13   | NOS2A   |
| LTA_02     | LTA     | CLCA2_02   | CLCA2   | NOS2A_14   | NOS2A   |
| LTA_04     | LTA     | CNTNAP1_01 | CNTNAP1 | NOS2A_15   | NOS2A   |
| MBD2_01    | MBD2    | CNTNAP1_02 | CNTNAP1 | NOS2A_16   | NOS2A   |
| MBD2_04    | MBD2    | CNTNAP1_03 | CNTNAP1 | NOS2A_17   | NOS2A   |
| MBD2_04_2  | MBD2    | CORO1C_01  | CORO1C  | NOS2A_18   | NOS2A   |
| MBL2_01    | MBL2    | CRP_02     | CRP     | NOS2A_19   | NOS2A   |
| MBL2_03    | MBL2    | CRP_03     | CRP     | NOS2A_20   | NOS2A   |
| MBL2_25    | MBL2    | CRP_14     | CRP     | NOS2A_21   | NOS2A   |
| MBL2_26    | MBL2    | CRP_15     | CRP     | NOS2A_22   | NOS2A   |
| MBL2_28    | MBL2    | CRP_16     | CRP     | NOS2A_23   | NOS2A   |
| MBL2_29    | MBL2    | CTNNB1_13  | CTNNB1  | NOS2A_25   | NOS2A   |
| MC1R_01    | MC1R    | CTNNB1_22  | CTNNB1  | NOS2A_26   | NOS2A   |
| MC1R_05    | MC1R    | CTNNB1_23  | CTNNB1  | NOS2A_28   | NOS2A   |
| MGC4093_03 | MGC4093 | CYBA_08    | CYBA    | NOS2A_29   | NOS2A   |
| MGMT_01    | MGMT    | CYBA_14    | CYBA    | NOS3_01    | NOS3    |
| MGMT_03    | MGMT    | CYP21A2_04 | CYP21A2 | NOS3_23    | NOS3    |
| MGMT_06    | MGMT    | DAB2_01    | DAB2    | NOS3_38    | NOS3    |
| MIF_01     | MIF     | DAB2_02    | DAB2    | NOS3_39    | NOS3    |
| MIF_01_2   | MIF     | DAB2_03    | DAB2    | NOS3_40    | NOS3    |
| MIF_04     | MIF     | DAB2_04    | DAB2    | NOS3_41    | NOS3    |
| MLH1_02    | MLH1    | DAF_01     | DAF     | NUDT6_01   | NUDT6   |
| MLH1_05    | MLH1    | DAF_02     | DAF     | NUDT6_02   | NUDT6   |
| MPO_02     | MPO     | DEF6_01    | DEF6    | OR10J3_01  | OR10J3  |
| MSH2_02    | MSH2    | DEF6_02    | DEF6    | OR10J3_02  | OR10J3  |
| MTHFD2_01  | MTHFD2  | DEF6_03    | DEF6    | PDCD10_01  | PDCD10  |
| MTHFR_01   | MTHFR   | DEF6_04    | DEF6    | PFKFB2_01  | PFKFB2  |
| MTHFR_02   | MTHFR   | DEFA3_02   | DEFA3   | PFKFB2_02  | PFKFB2  |
| MTHFS_01   | MTHFS   | DEFA3_03   | DEFA3   | PFKFB2_03  | PFKFB2  |
| MTRR_04    | MTRR    | DEFA3_05   | DEFA3   | PFKFB2_04  | PFKFB2  |
| MTR_01     | MTR     | DEFA3_06   | DEFA3   | PRO1580_01 | PRO1580 |
| MYC_01     | MYC     | DEFA3_08   | DEFA3   | PTGDR_01   | PTGDR   |
| NAT1_01    | NAT1    | DEFA3_09   | DEFA3   | PTGDR_02   | PTGDR   |
| NAT1_02    | NAT1    | DEFA3_10   | DEFA3   | PTGDR_03   | PTGDR   |
| NAT1_05    | NAT1    | DEFA3_11   | DEFA3   | PTGDR_04   | PTGDR   |
| NAT1_05_2  | NAT1    | DEFA3_12   | DEFA3   | PTGDR_05   | PTGDR   |
| NAT1_07    | NAT1    | DEFA3_13   | DEFA3   | PTGDR_06   | PTGDR   |
| NAT1_07_2  | NAT1    | DEFA4_01   | DEFA4   | PTGDR_07   | PTGDR   |
| NAT2_01    | NAT2    | DEFA4_02   | DEFA4   | PTGDR_08   | PTGDR   |
| NAT2_02    | NAT2    | DEFA4_03   | DEFA4   | PTK9L_01   | PTK9L   |
| NAT2_02_2  | NAT2    | DEFA4_04   | DEFA4   | PTK9L_02   | PTK9L   |
| NAT2_05    | NAT2    | DEFA4_05   | DEFA4   | PTK9L_03   | PTK9L   |
| NAT2_06    | NAT2    | DEFA4_06   | DEFA4   | PTK9_01    | PTK9    |
| NAT2_07    | NAT2    | DEFA5_01   | DEFA5   | RAC1_05    | RAC1    |
| NAT2_07_2  | NAT2    | DEFA5_02   | DEFA5   | RAC1_06    | RAC1    |
| NAT2_08    | NAT2    | DEFA5_03   | DEFA5   | RAC1_07    | RAC1    |

|              |           |            |         |            |         |
|--------------|-----------|------------|---------|------------|---------|
| NAT2_08_2    | NAT2      | DEFA5_04   | DEFA5   | RAC1_08    | RAC1    |
| NBS1_01      | NBS1      | DEFA5_06   | DEFA5   | RAC1_09    | RAC1    |
| NFKBIE_03    | NFKBIE    | DEFA5_07   | DEFA5   | RAC1_10    | RAC1    |
| NOS2A_01     | NOS2A     | DEFA6_01   | DEFA6   | RAC1_11    | RAC1    |
| NOS2A_02     | NOS2A     | DEFA6_02   | DEFA6   | RAC2_01    | RAC2    |
| NOS2A_03     | NOS2A     | DEFA6_03   | DEFA6   | RAC2_05    | RAC2    |
| NOS2A_07     | NOS2A     | DEFA6_04   | DEFA6   | RAC2_06    | RAC2    |
| NOS3_01      | NOS3      | DEFA6_05   | DEFA6   | RAC2_09    | RAC2    |
| NOS3_07      | NOS3      | DEFA6_06   | DEFA6   | RAC2_14    | RAC2    |
| NOS3_11      | NOS3      | DEFA6_07   | DEFA6   | RAC2_15    | RAC2    |
| NQO1_01      | NQO1      | DEFA6_08   | DEFA6   | RAC2_16    | RAC2    |
| OGG1_04      | OGG1      | DEFA6_09   | DEFA6   | RAC2_17    | RAC2    |
| PARP1_01     | PARP1     | DEFA6_10   | DEFA6   | RAC2_18    | RAC2    |
| PON1_01      | PON1      | DEFB118_01 | DEFB118 | RAC2_19    | RAC2    |
| PON1_02      | PON1      | DEFB118_02 | DEFB118 | RAC2_20    | RAC2    |
| PPARG_02     | PPARG     | DEFB118_03 | DEFB118 | RAC2_21    | RAC2    |
| PTGS2_32     | PTGS2     | DEFB119_01 | DEFB119 | RAC2_22    | RAC2    |
| RAD23B_04    | RAD23B    | DEFB119_02 | DEFB119 | RAC2_23    | RAC2    |
| RAG1_01      | RAG1      | DEFB126_01 | DEFB126 | RAC2_24    | RAC2    |
| ROS1_02      | ROS1      | DEFB126_02 | DEFB126 | RAVER1_01  | RAVER1  |
| SELE_01      | SELE      | DEFB126_03 | DEFB126 | SCGB1A1_01 | SCGB1A1 |
| SHMT1_01     | SHMT1     | DEFB127_01 | DEFB127 | SCGB1A1_02 | SCGB1A1 |
| SHMT1_02     | SHMT1     | DEFB1_01   | DEFB1   | SCGB1A1_03 | SCGB1A1 |
| SLC19A1_02   | SLC19A1   | DEFB1_02   | DEFB1   | SCGB1A1_04 | SCGB1A1 |
| SLC19A1_03   | SLC19A1   | DEFB1_03   | DEFB1   | SCGB1A1_05 | SCGB1A1 |
| SOD2_01      | SOD2      | DEFB1_04   | DEFB1   | SCNN1A_01  | SCNN1A  |
| STAT1_01     | STAT1     | DEFB1_05   | DEFB1   | SECTM1_01  | SECTM1  |
| STK11_01     | STK11     | DEFB1_06   | DEFB1   | SECTM1_02  | SECTM1  |
| STK11_03     | STK11     | DEFB1_07   | DEFB1   | SECTM1_03  | SECTM1  |
| TCN1_02      | TCN1      | DEFB1_08   | DEFB1   | SECTM1_04  | SECTM1  |
| TCN1_02_2    | TCN1      | DEFB1_09   | DEFB1   | SECTM1_05  | SECTM1  |
| TERT_01      | TERT      | DEFB1_11   | DEFB1   | SELE_02    | SELE    |
| TERT_03      | TERT      | DEFB1_12   | DEFB1   | SELE_18    | SELE    |
| TGFB1_01     | TGFB1     | DEFB1_13   | DEFB1   | SELE_31    | SELE    |
| TGFB1_01_2   | TGFB1     | DHX33_02   | DHX33   | SELE_32    | SELE    |
| TGFBR1_01    | TGFBR1    | DHX33_03   | DHX33   | SELE_33    | SELE    |
| TLR2_04      | TLR2      | DLG5_01    | DLG5    | SELE_34    | SELE    |
| TLR4_01      | TLR4      | DLG5_02    | DLG5    | SELE_35    | SELE    |
| TNFRSF10A_01 | TNFRSF10A | DLG5_03    | DLG5    | SELE_36    | SELE    |
| TNF_02       | TNF       | DLG5_06    | DLG5    | SELE_37    | SELE    |
| TNF_04       | TNF       | F5_04      | F5      | SELE_38    | SELE    |
| TNF_07       | TNF       | FCER1A_01  | FCER1A  | SELE_39    | SELE    |
| TNF_09       | TNF       | FCER1A_02  | FCER1A  | SELPLG_01  | SELPLG  |
| TP53_01      | TP53      | FCER1A_03  | FCER1A  | SELPLG_02  | SELPLG  |
| TYMS_01      | TYMS      | FCER1A_04  | FCER1A  | SELPLG_03  | SELPLG  |
| TYMS_20      | TYMS      | FCER1A_05  | FCER1A  | SELP_01    | SELP    |
| VCAM1_02     | VCAM1     | FCER1G_01  | FCER1G  | SELP_02    | SELP    |

|           |        |           |        |             |          |
|-----------|--------|-----------|--------|-------------|----------|
| VCAM1_05  | VCAM1  | FCER1G_02 | FCER1G | SELP_03     | SELP     |
| VDR_01    | VDR    | FCER1G_03 | FCER1G | SELP_04     | SELP     |
| VDR_04    | VDR    | FCER1G_04 | FCER1G | SELP_05     | SELP     |
| VDR_08    | VDR    | FCER1G_05 | FCER1G | SELP_06     | SELP     |
| VEGF_01   | VEGF   | FCER1G_06 | FCER1G | SELP_07     | SELP     |
| VEGF_03   | VEGF   | FCER1G_07 | FCER1G | SELP_08     | SELP     |
| VEGF_18   | VEGF   | FCER2_02  | FCER2  | SELP_09     | SELP     |
| WRN_01    | WRN    | FCER2_03  | FCER2  | SELP_10     | SELP     |
| WRN_02    | WRN    | FCER2_04  | FCER2  | SELP_11     | SELP     |
| WRN_03    | WRN    | FCER2_05  | FCER2  | SELP_12     | SELP     |
| WRN_03_2  | WRN    | FCER2_06  | FCER2  | SELP_13     | SELP     |
| WRN_04    | WRN    | FCER2_07  | FCER2  | SELP_14     | SELP     |
| XPC_01    | XPC    | FCER2_09  | FCER2  | SELP_15     | SELP     |
| XRCC1_01  | XRCC1  | FCER2_10  | FCER2  | SELP_16     | SELP     |
| XRCC1_02  | XRCC1  | FCER2_11  | FCER2  | SELP_18     | SELP     |
| XRCC1_03  | XRCC1  | FCER2_12  | FCER2  | SELP_19     | SELP     |
| XRCC2_01  | XRCC2  | FCER2_13  | FCER2  | SELP_20     | SELP     |
| XRCC3_01  | XRCC3  | FCER2_14  | FCER2  | SELP_21     | SELP     |
| XRCC4_01  | XRCC4  | FCGR2A_03 | FCGR2A | SELP_22     | SELP     |
| XRCC4_02  | XRCC4  | FCGR2A_05 | FCGR2A | SELP_23     | SELP     |
| XRCC4_08  | XRCC4  | FCGR2A_06 | FCGR2A | SELP_25     | SELP     |
| ACAA1_01  | ACAA1  | FCGR2A_08 | FCGR2A | SELP_26     | SELP     |
| ACAD11_01 | ACAD11 | FCGR2A_10 | FCGR2A | SELP_27     | SELP     |
| ACAD11_02 | ACAD11 | FCGR2A_11 | FCGR2A | SELP_28     | SELP     |
| ADAM19_01 | ADAM19 | FCGR2A_12 | FCGR2A | SELP_29     | SELP     |
| ADAM19_02 | ADAM19 | FCGR2A_13 | FCGR2A | SENP3_01    | SENP3    |
| ADAM19_03 | ADAM19 | FCGRT_01  | FCGRT  | SENP3_02    | SENP3    |
| ADAM19_04 | ADAM19 | FCGRT_02  | FCGRT  | SERPINB2_01 | SERPINB2 |
| ADAM19_05 | ADAM19 | FCGRT_03  | FCGRT  | SERPINB2_02 | SERPINB2 |
| ADAM19_06 | ADAM19 | FGF2_01   | FGF2   | SERPINB2_03 | SERPINB2 |
| ADAM19_07 | ADAM19 | FGF2_02   | FGF2   | SERPINB3_01 | SERPINB3 |
| ADAM19_08 | ADAM19 | FGF2_03   | FGF2   | SERPINB3_02 | SERPINB3 |
| ADAM19_09 | ADAM19 | FGF2_04   | FGF2   | SERPINB3_03 | SERPINB3 |
| ADAM19_10 | ADAM19 | FGF2_05   | FGF2   | SERPINB3_04 | SERPINB3 |
| ADAM19_11 | ADAM19 | FGF2_06   | FGF2   | SERPINB3_05 | SERPINB3 |
| ADAM19_12 | ADAM19 | FGF2_07   | FGF2   | SERPINB3_06 | SERPINB3 |
| ADAM19_13 | ADAM19 | FGF2_08   | FGF2   | SERPINC1_01 | SERPINC1 |
| ADAM19_14 | ADAM19 | FGF2_09   | FGF2   | SERPINC1_02 | SERPINC1 |
| ADAM19_15 | ADAM19 | FGF2_10   | FGF2   | SERPINC1_03 | SERPINC1 |
| ADAM19_16 | ADAM19 | FGF2_11   | FGF2   | SERPINC1_04 | SERPINC1 |
| ADAM19_17 | ADAM19 | FGF2_12   | FGF2   | SERPINC1_05 | SERPINC1 |
| ADAM19_18 | ADAM19 | FGF2_13   | FGF2   | SERPINC1_06 | SERPINC1 |
| ADAM19_19 | ADAM19 | FGF2_14   | FGF2   | SERPINE1_01 | SERPINE1 |
| ADAM19_20 | ADAM19 | FGF2_15   | FGF2   | SERPINE1_02 | SERPINE1 |
| ADAM19_21 | ADAM19 | FGF2_16   | FGF2   | SERPINE1_03 | SERPINE1 |
| ADAM19_22 | ADAM19 | FGF2_17   | FGF2   | SERPINE1_04 | SERPINE1 |
| ADAM19_23 | ADAM19 | FGF2_18   | FGF2   | SERPINE1_05 | SERPINE1 |

|            |         |             |          |             |          |
|------------|---------|-------------|----------|-------------|----------|
| ADAM19_24  | ADAM19  | FLJ90680_01 | FLJ90680 | SERPINE1_06 | SERPINE1 |
| ADAM19_25  | ADAM19  | FOXJ2_01    | FOXJ2    | SERPINE1_07 | SERPINE1 |
| ADAM19_26  | ADAM19  | GLS_01      | GLS      | SERPINE1_08 | SERPINE1 |
| ADAM19_27  | ADAM19  | GPR108_01   | GPR108   | SERPING1_01 | SERPING1 |
| ADAM19_28  | ADAM19  | GPR44_01    | GPR44    | SERPING1_02 | SERPING1 |
| ADAM19_29  | ADAM19  | HES7_01     | HES7     | SERPING1_03 | SERPING1 |
| ADAM19_30  | ADAM19  | HES7_02     | HES7     | SERPINI1_01 | SERPINI1 |
| ADAM19_31  | ADAM19  | HGF_01      | HGF      | SERPINI1_02 | SERPINI1 |
| ALOX12B_01 | ALOX12B | HGF_02      | HGF      | SERPINI1_03 | SERPINI1 |
| ALOX12B_02 | ALOX12B | HGF_03      | HGF      | SERPINI1_04 | SERPINI1 |
| ALOX12B_03 | ALOX12B | HGF_04      | HGF      | SERPINI1_05 | SERPINI1 |
| ALOX12B_06 | ALOX12B | HGF_05      | HGF      | SERPINI1_06 | SERPINI1 |
| ALOX12B_07 | ALOX12B | HGF_06      | HGF      | SERPINI1_07 | SERPINI1 |
| ALOX12B_08 | ALOX12B | HGF_07      | HGF      | SERPINI1_08 | SERPINI1 |
| ALOX12B_09 | ALOX12B | HGF_08      | HGF      | SERPINI1_09 | SERPINI1 |
| ALOX12B_10 | ALOX12B | HGF_09      | HGF      | SERPINI1_10 | SERPINI1 |
| ALOX12B_11 | ALOX12B | HGF_10      | HGF      | SERPINI1_11 | SERPINI1 |
| ALOX12B_12 | ALOX12B | HGF_11      | HGF      | SERPINI1_12 | SERPINI1 |
| ALOX12B_13 | ALOX12B | HGF_12      | HGF      | SERPINI1_13 | SERPINI1 |
| ALOX12B_14 | ALOX12B | HGF_13      | HGF      | SERPINI1_14 | SERPINI1 |
| ALOX12B_15 | ALOX12B | HGF_14      | HGF      | SERPINI1_15 | SERPINI1 |
| ALOX12B_16 | ALOX12B | HGF_15      | HGF      | SERPINI1_16 | SERPINI1 |
| ALOX12B_17 | ALOX12B | HGF_16      | HGF      | SERPINI1_17 | SERPINI1 |
| ALOX12_05  | ALOX12  | HGF_17      | HGF      | SERPINI1_18 | SERPINI1 |
| ALOX12_06  | ALOX12  | HSPA6_01    | HSPA6    | SFRS15_02   | SFRS15   |
| ALOX12_07  | ALOX12  | HSPA6_02    | HSPA6    | SLC2A11_01  | SLC2A11  |
| ALOX12_09  | ALOX12  | HSPA6_03    | HSPA6    | SOCS1_03    | SOCS1    |
| ALOX15B_01 | ALOX15B | HSPA6_04    | HSPA6    | SOCS1_10    | SOCS1    |
| ALOX15B_02 | ALOX15B | ICAM1_03    | ICAM1    | SOCS1_11    | SOCS1    |
| ALOX15B_03 | ALOX15B | ICAM1_15    | ICAM1    | SOCS2_01    | SOCS2    |
| ALOX15B_04 | ALOX15B | ICAM1_16    | ICAM1    | SOCS2_02    | SOCS2    |
| ALOX15B_05 | ALOX15B | ICAM1_19    | ICAM1    | SOCS2_03    | SOCS2    |
| ALOX15B_06 | ALOX15B | ICAM1_32    | ICAM1    | SOCS2_04    | SOCS2    |
| ALOX15B_07 | ALOX15B | ICAM2_01    | ICAM2    | SOCS3_01    | SOCS3    |
| ALOX15_01  | ALOX15  | ICAM2_02    | ICAM2    | SOCS3_02    | SOCS3    |
| ALOX15_02  | ALOX15  | ICAM2_03    | ICAM2    | SOCS3_03    | SOCS3    |
| ALOX15_17  | ALOX15  | ICAM3_01    | ICAM3    | SOCS3_04    | SOCS3    |
| ALOX15_18  | ALOX15  | ICAM3_02    | ICAM3    | SOCS4_01    | SOCS4    |
| ALOX15_19  | ALOX15  | ICAM3_03    | ICAM3    | SOCS4_02    | SOCS4    |
| ALOX5AP_01 | ALOX5AP | ICAM3_04    | ICAM3    | SOCS4_03    | SOCS4    |
| ALOX5AP_02 | ALOX5AP | ICAM3_05    | ICAM3    | SOCS4_04    | SOCS4    |
| ALOX5AP_03 | ALOX5AP | ICAM3_06    | ICAM3    | SOD1_03     | SOD1     |
| ALOX5AP_04 | ALOX5AP | ICAM4_01    | ICAM4    | SOD1_08     | SOD1     |
| ALOX5AP_05 | ALOX5AP | ICAM5_08    | ICAM5    | SOD1_16     | SOD1     |
| ALOX5AP_06 | ALOX5AP | ICHTHYIN_01 | ICHTHYIN | SOD2_16     | SOD2     |
| ALOX5AP_07 | ALOX5AP | ICHTHYIN_02 | ICHTHYIN | SOD2_20     | SOD2     |
| ALOX5AP_08 | ALOX5AP | ICHTHYIN_03 | ICHTHYIN | SOD2_29     | SOD2     |

|            |         |           |        |          |       |
|------------|---------|-----------|--------|----------|-------|
| ALOX5AP_09 | ALOX5AP | IL11RA_02 | IL11RA | SOD2_30  | SOD2  |
| ALOX5AP_10 | ALOX5AP | IL11RA_04 | IL11RA | SOD3_16  | SOD3  |
| ALOX5AP_11 | ALOX5AP | IL11RA_06 | IL11RA | SOD3_26  | SOD3  |
| ALOX5AP_12 | ALOX5AP | IL17C_01  | IL17C  | SOD3_27  | SOD3  |
| ALOX5AP_13 | ALOX5AP | IL8RA_04  | IL8RA  | SOD3_28  | SOD3  |
| ALOX5AP_14 | ALOX5AP | IL8RA_14  | IL8RA  | STAT1_01 | STAT1 |
| ALOX5AP_15 | ALOX5AP | IL8RA_25  | IL8RA  | STAT1_10 | STAT1 |
| ALOX5AP_16 | ALOX5AP | IL8RB_05  | IL8RB  | STAT1_11 | STAT1 |
| ALOX5AP_17 | ALOX5AP | IL8RB_06  | IL8RB  | STAT1_12 | STAT1 |
| ALOX5AP_18 | ALOX5AP | IL8RB_07  | IL8RB  | STAT1_13 | STAT1 |
| ALOX5AP_19 | ALOX5AP | IL8_33    | IL8    | STAT1_14 | STAT1 |
| ALOX5AP_20 | ALOX5AP | INSL3_01  | INSL3  | STAT1_15 | STAT1 |
| ALOX5AP_21 | ALOX5AP | INSL3_02  | INSL3  | STAT1_17 | STAT1 |
| ALOX5AP_22 | ALOX5AP | IRAK2_01  | IRAK2  | STAT1_18 | STAT1 |
| ALOX5_41   | ALOX5   | IRAK2_02  | IRAK2  | STAT1_19 | STAT1 |
| ALOX5_42   | ALOX5   | IRAK2_10  | IRAK2  | STAT1_20 | STAT1 |
| ALOX5_43   | ALOX5   | IRAK2_11  | IRAK2  | STAT1_21 | STAT1 |
| ALOX5_44   | ALOX5   | IRAK2_12  | IRAK2  | STAT1_22 | STAT1 |
| ALOX5_45   | ALOX5   | IRAK2_13  | IRAK2  | STAT1_23 | STAT1 |
| ALOX5_46   | ALOX5   | IRAK2_14  | IRAK2  | STAT2_02 | STAT2 |
| ALOX5_47   | ALOX5   | IRAK2_15  | IRAK2  | STAT3_01 | STAT3 |
| ALOX5_48   | ALOX5   | IRAK2_16  | IRAK2  | STAT3_02 | STAT3 |
| ALOX5_49   | ALOX5   | IRAK2_17  | IRAK2  | STAT3_03 | STAT3 |
| ALOX5_50   | ALOX5   | IRAK2_18  | IRAK2  | STAT3_04 | STAT3 |
| ALOX5_51   | ALOX5   | IRAK2_19  | IRAK2  | STAT3_05 | STAT3 |
| ALOX5_52   | ALOX5   | IRAK2_20  | IRAK2  | STAT3_06 | STAT3 |
| ALOX5_53   | ALOX5   | IRAK2_21  | IRAK2  | STAT4_08 | STAT4 |
| ALOX5_54   | ALOX5   | IRAK2_22  | IRAK2  | STAT4_09 | STAT4 |
| ALOX5_55   | ALOX5   | IRAK2_23  | IRAK2  | STAT4_10 | STAT4 |
| ALOXE3_01  | ALOXE3  | IRAK2_24  | IRAK2  | STAT4_11 | STAT4 |
| ALOXE3_02  | ALOXE3  | IRAK2_25  | IRAK2  | STAT4_12 | STAT4 |
| ALOXE3_03  | ALOXE3  | IRAK2_26  | IRAK2  | STAT4_13 | STAT4 |
| ALOXE3_04  | ALOXE3  | IRAK2_27  | IRAK2  | STAT4_14 | STAT4 |
| ALOXE3_05  | ALOXE3  | IRAK2_28  | IRAK2  | STAT4_15 | STAT4 |
| ALOXE3_06  | ALOXE3  | IRAK3_01  | IRAK3  | STAT4_16 | STAT4 |
| ALOXE3_07  | ALOXE3  | IRAK3_02  | IRAK3  | STAT4_17 | STAT4 |
| ALOXE3_08  | ALOXE3  | IRAK3_03  | IRAK3  | STAT4_18 | STAT4 |
| ALOXE3_09  | ALOXE3  | IRAK3_04  | IRAK3  | STAT4_19 | STAT4 |
| ALOXE3_10  | ALOXE3  | IRAK3_05  | IRAK3  | STAT4_20 | STAT4 |
| ALOXE3_11  | ALOXE3  | IRAK3_06  | IRAK3  | STAT4_21 | STAT4 |
| ALOXE3_12  | ALOXE3  | IRAK3_07  | IRAK3  | STAT4_22 | STAT4 |
| APOA2_02   | APOA2   | IRAK3_08  | IRAK3  | STAT4_23 | STAT4 |
| APOA2_04   | APOA2   | IRAK3_09  | IRAK3  | STAT4_24 | STAT4 |
| APOA2_06   | APOA2   | IRAK3_10  | IRAK3  | STAT4_25 | STAT4 |
| ATG9B_01   | ATG9B   | IRAK3_11  | IRAK3  | STAT4_26 | STAT4 |
| BAT5_01    | BAT5    | IRAK3_12  | IRAK3  | STAT4_29 | STAT4 |
| BAT5_02    | BAT5    | IRAK4_01  | IRAK4  | STAT4_30 | STAT4 |

|          |       |          |       |           |        |
|----------|-------|----------|-------|-----------|--------|
| BF_01    | BF    | IRAK4_02 | IRAK4 | STAT4_31  | STAT4  |
| BF_02    | BF    | IRAK4_03 | IRAK4 | STAT4_32  | STAT4  |
| BF_03    | BF    | IRAK4_04 | IRAK4 | STAT4_33  | STAT4  |
| BPI_02   | BPI   | IRAK4_05 | IRAK4 | STAT4_34  | STAT4  |
| BPI_03   | BPI   | ITGB2_01 | ITGB2 | STAT4_35  | STAT4  |
| BPI_04   | BPI   | ITGB2_02 | ITGB2 | STAT4_36  | STAT4  |
| BPI_05   | BPI   | ITGB2_03 | ITGB2 | STAT4_37  | STAT4  |
| BPI_06   | BPI   | ITGB2_04 | ITGB2 | STAT4_38  | STAT4  |
| BPI_07   | BPI   | ITGB2_05 | ITGB2 | STAT4_39  | STAT4  |
| BPI_08   | BPI   | ITGB2_06 | ITGB2 | STAT4_40  | STAT4  |
| BPI_09   | BPI   | ITGB2_07 | ITGB2 | STAT4_41  | STAT4  |
| BPI_10   | BPI   | ITGB2_08 | ITGB2 | STAT4_42  | STAT4  |
| BPI_11   | BPI   | ITGB2_09 | ITGB2 | STAT4_43  | STAT4  |
| BPI_12   | BPI   | ITGB2_10 | ITGB2 | STAT4_44  | STAT4  |
| BPI_13   | BPI   | ITGB2_11 | ITGB2 | STAT4_45  | STAT4  |
| BPI_14   | BPI   | ITGB2_12 | ITGB2 | STAT4_46  | STAT4  |
| BPI_15   | BPI   | ITGB2_13 | ITGB2 | STAT5A_01 | STAT5A |
| BPI_16   | BPI   | ITGB2_14 | ITGB2 | STAT5A_02 | STAT5A |
| BPI_17   | BPI   | ITGB2_15 | ITGB2 | STAT5B_01 | STAT5B |
| BPI_18   | BPI   | ITGB2_16 | ITGB2 | STAT5B_03 | STAT5B |
| BPI_19   | BPI   | ITGB2_17 | ITGB2 | STAT5B_04 | STAT5B |
| C1D_01   | C1D   | ITGB2_18 | ITGB2 | STAT6_01  | STAT6  |
| C1D_02   | C1D   | ITGB2_19 | ITGB2 | STAT6_03  | STAT6  |
| C1D_03   | C1D   | ITGB2_20 | ITGB2 | STAT6_05  | STAT6  |
| C1D_04   | C1D   | ITGB2_21 | ITGB2 | STAT6_12  | STAT6  |
| C1QA_01  | C1QA  | ITGB2_22 | ITGB2 | STAT6_14  | STAT6  |
| C1QA_02  | C1QA  | ITGB2_23 | ITGB2 | STAT6_15  | STAT6  |
| C1QA_03  | C1QA  | ITGB2_25 | ITGB2 | STAT6_16  | STAT6  |
| C1QA_04  | C1QA  | ITGB2_26 | ITGB2 | STAT6_19  | STAT6  |
| C1QBP_01 | C1QBP | ITGB2_27 | ITGB2 | STK19_01  | STK19  |
| C1QBP_02 | C1QBP | ITGB2_28 | ITGB2 | STK19_02  | STK19  |
| C1QB_01  | C1QB  | JAK3_02  | JAK3  | TICAM1_01 | TICAM1 |
| C1QB_02  | C1QB  | JAK3_12  | JAK3  | TICAM1_02 | TICAM1 |
| C1QB_03  | C1QB  | JAK3_15  | JAK3  | TICAM1_03 | TICAM1 |
| C1QG_02  | C1QG  | JAK3_16  | JAK3  | TICAM1_04 | TICAM1 |
| C1QG_03  | C1QG  | JAK3_18  | JAK3  | TICAM1_05 | TICAM1 |
| C1QG_04  | C1QG  | JAK3_19  | JAK3  | TICAM1_06 | TICAM1 |
| C1QG_05  | C1QG  | JAK3_20  | JAK3  | TICAM1_07 | TICAM1 |
| C1QG_06  | C1QG  | JAK3_21  | JAK3  | TLR10_01  | TLR10  |
| C1QR1_02 | C1QR1 | JAK3_22  | JAK3  | TLR10_02  | TLR10  |
| C1QR1_03 | C1QR1 | JAK3_23  | JAK3  | TLR10_03  | TLR10  |
| C1QR1_04 | C1QR1 | JAK3_26  | JAK3  | TLR10_04  | TLR10  |
| C1QR1_05 | C1QR1 | KLK15_01 | KLK15 | TLR10_05  | TLR10  |
| C1QR1_06 | C1QR1 | KLK15_03 | KLK15 | TLR10_06  | TLR10  |
| C1QR1_07 | C1QR1 | KLK15_04 | KLK15 | TLR1_01   | TLR1   |
| C1QR1_08 | C1QR1 | KLK15_05 | KLK15 | TLR1_02   | TLR1   |
| C1QR1_09 | C1QR1 | KLK15_06 | KLK15 | TLR1_03   | TLR1   |

|          |       |          |       |             |          |
|----------|-------|----------|-------|-------------|----------|
| C1RL_01  | C1RL  | KLK1_01  | KLK1  | TLR2_05     | TLR2     |
| C1RL_02  | C1RL  | KLK1_02  | KLK1  | TLR2_17     | TLR2     |
| C1RL_03  | C1RL  | KLK1_03  | KLK1  | TLR2_18     | TLR2     |
| C1RL_04  | C1RL  | KLK1_04  | KLK1  | TLR2_19     | TLR2     |
| C1RL_05  | C1RL  | KLK1_05  | KLK1  | TLR2_20     | TLR2     |
| C1RL_06  | C1RL  | KLK1_06  | KLK1  | TLR3_01     | TLR3     |
| C1RL_07  | C1RL  | KLK2_01  | KLK2  | TLR3_02     | TLR3     |
| C1RL_08  | C1RL  | KLK2_03  | KLK2  | TLR3_03     | TLR3     |
| C1RL_09  | C1RL  | KLK2_04  | KLK2  | TLR3_05     | TLR3     |
| C1RL_10  | C1RL  | KLK2_06  | KLK2  | TLR3_06     | TLR3     |
| C1RL_11  | C1RL  | KLK4_01  | KLK4  | TLR3_07     | TLR3     |
| C1S_01   | C1S   | KLK4_02  | KLK4  | TLR3_08     | TLR3     |
| C1S_02   | C1S   | KLK4_03  | KLK4  | TLR3_09     | TLR3     |
| C1S_03   | C1S   | KLK4_04  | KLK4  | TLR3_10     | TLR3     |
| C1S_04   | C1S   | KLK4_05  | KLK4  | TLR3_11     | TLR3     |
| C1S_05   | C1S   | KLK4_06  | KLK4  | TLR4_07     | TLR4     |
| C1S_06   | C1S   | KLK4_07  | KLK4  | TLR4_11     | TLR4     |
| C2_01    | C2    | KLK4_08  | KLK4  | TLR4_12     | TLR4     |
| C2_02    | C2    | KLK4_09  | KLK4  | TLR4_23     | TLR4     |
| C2_03    | C2    | KLK4_10  | KLK4  | TLR4_27     | TLR4     |
| C2_04    | C2    | KLK4_11  | KLK4  | TLR4_28     | TLR4     |
| C2_05    | C2    | KLK4_12  | KLK4  | TLR4_29     | TLR4     |
| C2_06    | C2    | KLK4_13  | KLK4  | TLR4_30     | TLR4     |
| C2_07    | C2    | KLK4_14  | KLK4  | TLR4_31     | TLR4     |
| C3_01    | C3    | KLK6_01  | KLK6  | TLR4_32     | TLR4     |
| C3_02    | C3    | KLK6_02  | KLK6  | TLR6_02     | TLR6     |
| C3_03    | C3    | KLK6_03  | KLK6  | TLR6_03     | TLR6     |
| C3_04    | C3    | KLK7_01  | KLK7  | TLR6_04     | TLR6     |
| C3_05    | C3    | KLK7_02  | KLK7  | TLR9_01     | TLR9     |
| C3_06    | C3    | KLKB1_01 | KLKB1 | TNFRSF18_01 | TNFRSF18 |
| C3_07    | C3    | KLKB1_02 | KLKB1 | TNFSF18_01  | TNFSF18  |
| C3_08    | C3    | KLKB1_03 | KLKB1 | TNFSF18_02  | TNFSF18  |
| C3_09    | C3    | KLKB1_04 | KLKB1 | TNFSF18_03  | TNFSF18  |
| C3_11    | C3    | KLKB1_05 | KLKB1 | TNFSF18_04  | TNFSF18  |
| C3_12    | C3    | KLKB1_06 | KLKB1 | TNFSF9_01   | TNFSF9   |
| C3_13    | C3    | KLKB1_07 | KLKB1 | TNFSF9_02   | TNFSF9   |
| C3_14    | C3    | KLKB1_08 | KLKB1 | TNFSF9_04   | TNFSF9   |
| C3_15    | C3    | KLKB1_09 | KLKB1 | TOLLIP_01   | TOLLIP   |
| C3_16    | C3    | KLKB1_10 | KLKB1 | TOLLIP_02   | TOLLIP   |
| C3_17    | C3    | KLKB1_11 | KLKB1 | TOLLIP_03   | TOLLIP   |
| C3_18    | C3    | KLKB1_12 | KLKB1 | TOLLIP_04   | TOLLIP   |
| C4BPA_01 | C4BPA | KLKB1_13 | KLKB1 | TOLLIP_05   | TOLLIP   |
| C4BPA_02 | C4BPA | KLKB1_14 | KLKB1 | TOLLIP_08   | TOLLIP   |
| C4BPA_03 | C4BPA | LBP_01   | LBP   | TRAM1_01    | TRAM1    |
| C4BPA_04 | C4BPA | LBP_02   | LBP   | TRAM1_02    | TRAM1    |
| C4BPA_05 | C4BPA | LBP_03   | LBP   | TRAM1_03    | TRAM1    |
| C4BPA_06 | C4BPA | LBP_04   | LBP   | TRAM1_04    | TRAM1    |

|            |         |              |           |          |       |
|------------|---------|--------------|-----------|----------|-------|
| C4BPA_07   | C4BPA   | LBP_05       | LBP       | TRAM1_05 | TRAM1 |
| C4BPA_08   | C4BPA   | LBP_06       | LBP       | TRAM1_06 | TRAM1 |
| C4BPA_09   | C4BPA   | LBP_07       | LBP       | TRAM1_07 | TRAM1 |
| C4BPA_10   | C4BPA   | LBP_08       | LBP       | TRAM1_08 | TRAM1 |
| C4BPA_11   | C4BPA   | LBP_09       | LBP       | TSLP_01  | TSLP  |
| C4BPB_01   | C4BPB   | LBP_10       | LBP       | TSLP_02  | TSLP  |
| C4BPB_02   | C4BPB   | LBP_11       | LBP       | TSLP_03  | TSLP  |
| C4BPB_03   | C4BPB   | LBP_12       | LBP       | TSLP_04  | TSLP  |
| C4BPB_04   | C4BPB   | LBP_13       | LBP       | TSLP_05  | TSLP  |
| C5R1_01    | C5R1    | LBP_14       | LBP       | TSLP_06  | TSLP  |
| C5_01      | C5      | LMAN1_01     | LMAN1     | TSLP_07  | TSLP  |
| C5_02      | C5      | LMAN1_02     | LMAN1     | TSLP_08  | TSLP  |
| C5_03      | C5      | LMAN1_04     | LMAN1     | TSLP_09  | TSLP  |
| C5_04      | C5      | LMAN1_05     | LMAN1     | TYK2_63  | TYK2  |
| C5_05      | C5      | LMAN1_06     | LMAN1     | VCAM1_02 | VCAM1 |
| C5_06      | C5      | LMAN1_07     | LMAN1     | VCAM1_47 | VCAM1 |
| C5_07      | C5      | LMAN1_08     | LMAN1     | VCAM1_51 | VCAM1 |
| C5_08      | C5      | LMAN1_09     | LMAN1     | VCAM1_57 | VCAM1 |
| C5_09      | C5      | LMAN1_11     | LMAN1     | VCAM1_61 | VCAM1 |
| C5_10      | C5      | LOC390183_01 | LOC390183 | VCAM1_62 | VCAM1 |
| C5_11      | C5      | LOC390183_02 | LOC390183 | VCAM1_65 | VCAM1 |
| C5_12      | C5      | LOC390183_03 | LOC390183 | VCAM1_68 | VCAM1 |
| C5_13      | C5      | LPO_11       | LPO       | VCAM1_73 | VCAM1 |
| C5_14      | C5      | LTBR_01      | LTBR      | VCAM1_74 | VCAM1 |
| C5_15      | C5      | LTBR_02      | LTBR      | VCAM1_77 | VCAM1 |
| C6_01      | C6      | LTBR_03      | LTBR      | VCAM1_91 | VCAM1 |
| C6_02      | C6      | LTBR_04      | LTBR      | WDHD1_01 | WDHD1 |
| C6_03      | C6      | LY6G6D_01    | LY6G6D    | XDH_33   | XDH   |
| C6_04      | C6      | LY6G6D_02    | LY6G6D    | XDH_34   | XDH   |
| C6_05      | C6      | LY96_01      | LY96      | XDH_35   | XDH   |
| C6_06      | C6      | LY96_02      | LY96      | XDH_36   | XDH   |
| C6_07      | C6      | LY96_03      | LY96      | XDH_37   | XDH   |
| C6_08      | C6      | LY96_04      | LY96      | XDH_38   | XDH   |
| C6_09      | C6      | LY96_05      | LY96      | XDH_39   | XDH   |
| C6_10      | C6      | LY96_06      | LY96      | XDH_40   | XDH   |
| C6_11      | C6      | LY96_07      | LY96      | XDH_41   | XDH   |
| C6_12      | C6      | LY96_08      | LY96      | XDH_42   | XDH   |
| C6_13      | C6      | MAL_01       | MAL       | XDH_43   | XDH   |
| C6_14      | C6      | MAL_02       | MAL       | XDH_44   | XDH   |
| C6_15      | C6      | MAL_03       | MAL       | XDH_45   | XDH   |
| C6_16      | C6      | MAL_04       | MAL       | XDH_46   | XDH   |
| C6_17      | C6      | MAL_05       | MAL       | XDH_47   | XDH   |
| C6_18      | C6      | MAL_06       | MAL       | XDH_48   | XDH   |
| C6_19      | C6      | MASP1_08     | MASP1     | XDH_50   | XDH   |
| C6_20      | C6      | MASP1_121    | MASP1     | XDH_51   | XDH   |
| C7ORF24_01 | C7ORF24 | MASP1_142    | MASP1     | XDH_52   | XDH   |
| C7_01      | C7      | MASP1_148    | MASP1     | XDH_53   | XDH   |

|        |     |           |       |          |       |
|--------|-----|-----------|-------|----------|-------|
| C7_02  | C7  | MASP1_149 | MASP1 | ZNF76_01 | ZNF76 |
| C7_03  | C7  | MASP1_150 | MASP1 | ZP1_01   | ZP1   |
| C7_04  | C7  | MASP1_151 | MASP1 | ZP1_02   | ZP1   |
| C7_05  | C7  | MASP1_152 | MASP1 |          |       |
| C7_06  | C7  | MASP1_153 | MASP1 |          |       |
| C7_08  | C7  | MASP1_154 | MASP1 |          |       |
| C7_09  | C7  | MASP1_155 | MASP1 |          |       |
| C7_10  | C7  | MASP1_156 | MASP1 |          |       |
| C7_11  | C7  | MASP1_157 | MASP1 |          |       |
| C7_12  | C7  | MASP1_158 | MASP1 |          |       |
| C7_13  | C7  | MASP1_159 | MASP1 |          |       |
| C7_14  | C7  | MASP1_160 | MASP1 |          |       |
| C7_15  | C7  | MASP1_161 | MASP1 |          |       |
| C7_16  | C7  | MASP1_162 | MASP1 |          |       |
| C7_17  | C7  | MASP1_163 | MASP1 |          |       |
| C7_18  | C7  | MASP1_164 | MASP1 |          |       |
| C8A_01 | C8A | MASP1_165 | MASP1 |          |       |
| C8A_02 | C8A | MASP1_166 | MASP1 |          |       |
| C8A_03 | C8A | MASP1_167 | MASP1 |          |       |
| C8A_04 | C8A | MASP1_168 | MASP1 |          |       |
| C8A_05 | C8A | MASP1_169 | MASP1 |          |       |
| C8A_06 | C8A | MASP1_170 | MASP1 |          |       |
| C8A_07 | C8A | MASP1_171 | MASP1 |          |       |
| C8A_08 | C8A | MASP1_172 | MASP1 |          |       |
| C8B_01 | C8B | MASP1_173 | MASP1 |          |       |
| C8B_02 | C8B | MASP1_21  | MASP1 |          |       |
| C8B_03 | C8B | MASP1_24  | MASP1 |          |       |
| C8B_04 | C8B | MASP1_31  | MASP1 |          |       |
| C8B_05 | C8B | MASP1_32  | MASP1 |          |       |
| C8B_06 | C8B | MASP1_40  | MASP1 |          |       |
| C8B_07 | C8B | MASP1_42  | MASP1 |          |       |
| C8B_08 | C8B | MASP1_43  | MASP1 |          |       |
| C8B_09 | C8B | MASP1_45  | MASP1 |          |       |
| C8B_10 | C8B | MASP1_48  | MASP1 |          |       |
| C8B_11 | C8B | MASP1_50  | MASP1 |          |       |
| C8B_12 | C8B | MASP1_53  | MASP1 |          |       |
