# Supplementary material
Source: PubMed Central journal article supplement (PMC3021201)
Supplement: appendix2.pdf [file appendix2.pdf]

Estimated regression coefficients and p-values from Cox proportional hazards models using only the clinical risk factors

|                    |                    | Cohort 1   |         | Cohort 2   |         | DLBCL      |         | FL         |         |
|--------------------|--------------------|------------|---------|------------|---------|------------|---------|------------|---------|
|                    | sample size        | 496        |         | 346        |         | 138        |         | 101        |         |
|                    |                    | Est. Coef. | p-value |
| Age                |                    | 0.560      | 0.000   | 0.565      | 0.000   | 0.465      | 0.002   | 0.507      | 0.011   |
| Education          | level 1            |            |         |            |         |            |         |            |         |
|                    | level 2            | 0.294      | 0.061   | 0.242      | 0.220   | 1.019      | 0.003   | -0.815     | 0.052   |
|                    | level 3            | -0.032     | 0.880   | 0.030      | 0.900   | 1.277      | 0.001   | -1.311     | 0.027   |
| Tumor stage        | level 1            |            |         |            |         |            |         |            |         |
|                    | level 2            | 0.470      | 0.034   | 0.429      | 0.110   | 0.640      | 0.073   | 0.684      | 0.220   |
|                    | level 3            | 0.342      | 0.280   | 0.464      | 0.190   | 0.014      | 0.980   | 1.705      | 0.011   |
|                    | level 4            | 0.554      | 0.001   | 0.507      | 0.012   | 0.627      | 0.066   | 0.086      | 0.860   |
|                    | Unknown            | 0.718      | 0.092   | 0.774      | 0.200   | NA         | NA      | NA         | NA      |
| B-symptom presence | no                 |            |         |            |         |            |         |            |         |
|                    | yes                | 0.501      | 0.150   | 0.698      | 0.110   | 0.939      | 0.100   | 1.894      | 0.190   |
|                    | Unknown            | 0.098      | 0.660   | 0.303      | 0.310   | 0.483      | 0.210   | 1.241      | 0.160   |
| Initial treatment  | none               |            |         |            |         |            |         |            |         |
|                    | radiation only     | -0.061     | 0.810   | 0.048      | 0.860   | 0.070      | 0.890   | -0.415     | 0.480   |
|                    | chemotherapy-based | 0.295      | 0.060   | 0.261      | 0.200   | 0.047      | 0.910   | -0.329     | 0.450   |
|                    | other              | -0.243     | 0.740   | 0.452      | 0.540   | NA         | NA      | NA         | NA      |
